# Supplementary material for: Analysis of sesquiterpene hydrocarbons in grape berry exocarp (Vitis vinifera L.) using in vivo-labeling and comprehensive two-dimensional gas chromatography–mass spectrometry (GC×GC–MS)
Source: PubMed Central journal article supplement (PMC6720654; doi:10.3762/bjoc.15.190), 2019-08-14
Supplement: Beilstein_J_Org_Chem-15-1945-s001.pdf [file Beilstein_J_Org_Chem-15-1945-s001.pdf]

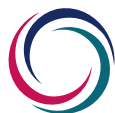

## Supporting Information

for

### **Analysis of sesquiterpene hydrocarbons in grape berry exocarp (*Vitis vinifera* L.) using in vivo-labeling and comprehensive two-dimensional gas chromatography–mass spectrometry (GC×GC–MS)**

Philipp P. Könen and Matthias Wüst

*Beilstein J. Org. Chem.* **2019**, *15*, 1945–1961. [doi:10.3762/bjoc.15.190](https://doi.org/10.3762/bjoc.15.190)

### **3D view of signals from genuine and deuterated $\alpha$ -cubebene, $\alpha$ -ylangene and $\delta$ -elemene after feeding experiments using $d_3$ -MVL**

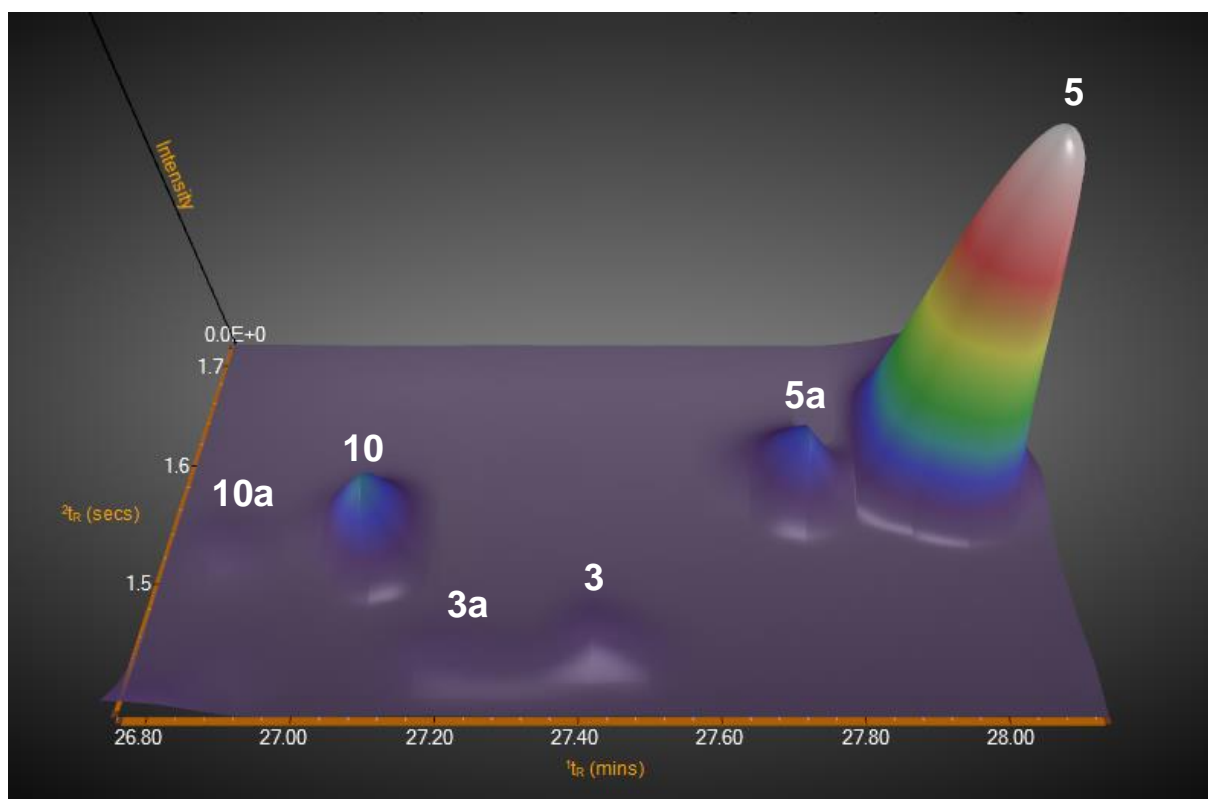

**Figure S1:** Section of a surface chart (TIC) of a HS-SPME–GC×GC–TOF–MS measurement of genuine sesquiterpene hydrocarbons and their deuterated isotopologues after feeding grape berry exocarp of the grape variety Lemberger with  $d_3$ -MVL. The data is displayed in 3D format, so that the signal intensities are represented in the form of conical signals. Shown are the signals of the two tricyclic sesquiterpene hydrocarbons  $\alpha$ -cubebene ( $d_0$ , **10**;  $d_8$ , **10a**) and  $\alpha$ -ylangene ( $d_0$ , **5**;  $d_8$ , **5a**) as well as the monocyclic compound  $\delta$ -elemene ( $d_0$ , **3**;  $d_8$ , **3a**).
