# Supplementary material for: Analysis of sesquiterpene hydrocarbons in grape berry exocarp (Vitis vinifera L.) using in vivo-labeling and comprehensive two-dimensional gas chromatography–mass spectrometry (GC×GC–MS)
Source: PubMed Central journal article supplement (PMC6720654; doi:10.3762/bjoc.15.190), 2019-08-14
Supplement: Beilstein_J_Org_Chem-15-1945-s004.pdf [file Beilstein_J_Org_Chem-15-1945-s004.pdf]

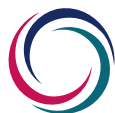

## Supporting Information

for

### **Analysis of sesquiterpene hydrocarbons in grape berry exocarp (*Vitis vinifera* L.) using in vivo-labeling and comprehensive two-dimensional gas chromatography–mass spectrometry (GC×GC–MS)**

Philipp P. Könen and Matthias Wüst

*Beilstein J. Org. Chem.* **2019**, *15*, 1945–1961. [doi:10.3762/bjoc.15.190](https://doi.org/10.3762/bjoc.15.190)

### **Putative formation pathway of $d_8$ -(*E*)- $\beta$ -caryophyllene and $d_9$ - $\alpha$ -humulene starting from $d_9$ -farnesyl pyrophosphate**

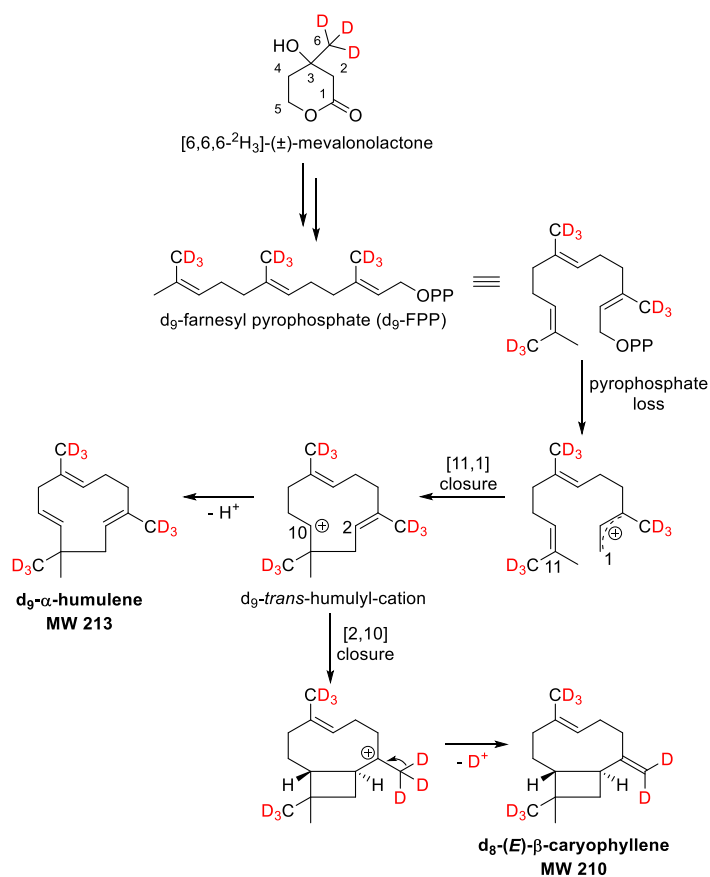

**Scheme S1:** Possible formation of the sesquiterpene hydrocarbons  $d_8\text{-}(E)\text{-}\beta\text{-caryophyllene}$  and  $d_9\text{-}\alpha\text{-humulene}$  in grapes from  $d_9\text{-farnesyl pyrophosphate (d}_9\text{-FPP)}$ . The assumed structural formulas of  $d_8\text{-}(E)\text{-}\beta\text{-caryophyllene}$  and  $d_9\text{-}\alpha\text{-humulene}$  are based on feeding experiments of isolated exocarp of the grape variety Lemberger using  $d_3\text{-MVL}$ .
